# Supplementary material for: RlmCD-mediated U747 methylation promotes efficient G748 methylation by methyltransferase RlmAII in 23S rRNA in Streptococcus pneumoniae; interplay between two rRNA methylations responsible for telithromycin susceptibility
Source: PubMed Central journal article supplement (PMC4605293; doi:10.1093/nar/gkv609), 2015-10-10
Supplement: supp_gkv609_nar-00714-r-2015-File008.pdf [file supp_gkv609_nar-00714-r-2015-File008.pdf]

## Supplementary Tables

**Table S1 Bacterial strains used in this study**

| Strain                          | Relevant characteristics           | Reference of source |
|---------------------------------|------------------------------------|---------------------|
| <i>Streptococcus pneumoniae</i> |                                    |                     |
| TIGR4                           | Prototroph                         | Purchased from ATCC |
| ATCC49619                       | Drug sensitive                     | Purchased from ATCC |
| S1                              | TEL resistance clinical isolate    | (10)                |
| Sp224                           | TIGR4 harboring pTKY1041           | This study          |
| Sp274                           | $\Delta tlrB::aad(9)$ in S1        | (10)                |
| Sp303                           | $\Delta tlrB::aad(9)$ in TIGR4     | (10)                |
| Sp322                           | Sp303 harboring pTKY1111           | This study          |
| Sp331                           | $\Delta SP\_1901::aad(9)$ in TIGR4 | This study          |
| Sp332                           | $\Delta rlmCD::aad(9)$ in TIGR4    | This study          |
| Sp338                           | Sp332 harboring pTKY1041           | This study          |
| Sp345                           | $\Delta rlmCD::aad(9)$ in S1       | This study          |
| Sp355                           | Sp345 harboring pTKY1111           | This study          |
| Sp360                           | Sp345 harboring pTKY1196           | This study          |
| Sp361                           | Sp332 harboring pTKY1196           | This study          |
| Sp369                           | $\Delta rlmCD::erm(B)$ in Sp303    | This study          |
| Sp370                           | Sp332 harboring pTKY1121           | This study          |

**Table S2 Plasmids used in this study**

| Plasmid   | Relevant characteristics                                                                            | Reference of source |
|-----------|-----------------------------------------------------------------------------------------------------|---------------------|
| pUC18     | Cloning vector                                                                                      | Lab. collection     |
| pLZ12-Km2 | Shuttle vector                                                                                      | (17)                |
| pAM225    | Shuttle vector:pBR325 carrying Tn917                                                                | (18)                |
| pGEX-6p-1 | GST gene fusion vector                                                                              | GE Healthcare       |
| pTKY862   | pLZ12-Km2 with Sp resistant cassette <i>aad(9)</i>                                                  | (17)                |
| pTKY1041  | pLZ12-Km2 with 1401 bp <i>erm(B)</i> fragment from S1                                               | (10)                |
| pTKY1109  | pUC18 with 328 bp <i>tlrB</i> fragment                                                              | (10)                |
| pTKY1110  | pUC18 with disrupted <i>tlrB</i> fragment by insertion of an Sp resistant cassette <i>aad(9)</i>    | (10)                |
| pTKY1111  | pLZ12-Km2 with 1065 bp <i>tlrB</i> fragment from S1                                                 | (10)                |
| pTKY1121  | pLZ12-Km2 with 1065 bp <i>tlrB</i> fragment from TIGR4                                              | This study          |
| pTKY1156  | pUC18 with bp <i>SP_1901</i> fragment                                                               | This study          |
| pTKY1157  | pUC18 with 1240 bp <i>rlmCD</i> fragment                                                            | This study          |
| pTKY1161  | pUC18 with disrupted <i>SP_1901</i> fragment by insertion of an Sp resistant cassette <i>aad(9)</i> | This study          |
| pTKY1174  | pUC18 with disrupted <i>rlmCD</i> fragment by insertion of an Sp resistant cassette <i>aad(9)</i>   | This study          |
| pTKY1196  | pLZ12-Km2 with 2112 bp <i>rlmCD</i> fragment from S1                                                | This study          |
| pTKY1201  | pGEX6p-1 with 864 bp <i>tlrB</i> fragment from TIGR4                                                | This study          |
| pTKY1205  | pUC18 with disrupted <i>rlmCD</i> fragment by insertion of an Em resistant cassette <i>erm(B)</i> . | This study          |

## Supplementary Figures

**Figure S1 Amino acid alignment of *E. coli* RlmC, *S. pneumoniae* SP\_1029 and SP\_1901, and *B. subtilis* YefA.**

```

E.coli RlmC      1 -----MQ 2
Sp1029          1 -----MLKKNDIVEVEIVDLTHEGAGVAKVDGLVFFVENALPSEKILMRVLKVNKKIGFGKVEKYLVSQPHRNQDLDLAY 75
Sp1901          1 -----MGINGEGIGFYQKTLVFPVPGALKGEDIYCQITSIRRNFFVEAKLLKVNKSKFRIVPSCSTIY 61
B.subtilis YefA 1 MKMKPPVEKNEYDVTFEDLTHEGAGVAKVQGFPIFVFNALPEEKAQIKVTRVKKGFAGRLIELKEESPVRTDAPCPYI 80

E.coli RlmC      3 CALYDAGRCSRSCQWIMQPIPEQLSAKTADLKNLLADFPVEEWCAPVSGPEQGFENKAKMVSQSVVEKPLLCMLHRDG-TP 81
Sp1029          76 LRSGIADLGHLSYPEQLKFKTKQVKDSLYKIA--GIADVEVAETLGMHPVKYRNKAQVPVRRVNGVLETGFFRKNSHNL 153
Sp1901          62 NECGGCQIMHLHYDKOLEFKTDLHLQALKKFAPAGYENYERPTIGMQEPKYRRAKLFQTRKFKNQVKAQLYAQNSHYL 141
B.subtilis YefA 81 KQCGGCQLQHMTYEGQLLFKQKQVKDVLERIGKLDLSKVTVHPITLGMEDPWNVYRNKAQVPVGEREGGLVAGFYQQRSHDI 160

E.coli RlmC      82 EDLCDCPLYPASFAPVFAALPKFPIARAGLTPYNVARKGELKYLTLTESQSDGGMMLRFVLRSDTKLAQLRKALPWLHEQ 161
Sp1029          154 MPLEDFFIQDPVIDQVVVALRDLLRRFDLKPYPDEKESGLIRNLVVRRGHYSQQIMVVLV-TTRPKVFRVDQLIEQVIKQ 232
Sp1901          142 VELKDCLVQDKETQVIANRLAELL-TYHQIPIITDERKVLGVRTIMVRRARKTGQVQIIIV-TNR--QLNLTQLVKELVKD 217
B.subtilis YefA 161 IDMSACLIQSKNDEAVQAVKIDICANYGVKAYNEERHKGLRHLIMVRYGVVTGEMMIVFI-TRTSDFPHKAKIIEDITAQ 239

E.coli RlmC      162 LPOLKVITVNIQPVHMAIMEGETEYILTEQQALAERFNDVPLWIRPQSFQCTNPAVASQLYATARDWVRQLPVKHMWDLF 241
Sp1029          233 FPEIVSVMONINDQNTNAIFCKEWRTLYGQDYITDQMLGNDFQIAGPAFYQVNTFEMAERLYQTAIDFAELKKDDVIIDAY 312
Sp1901          218 FPEVVTVAVNTTAKTSELYEKEEIIWQESIQEGVLNVEFSLSPRAFVQLNPEQTEVLYSBAVKALDVDKEDHLIDAY 297
B.subtilis YefA 240 FPHVKSIVQNIINPNKTNVIFQNETNVIWGEYIYDLIGDVKFAISARSFYQVNPQTKVLYDKALEYAELOQEETVIDAY 319

E.coli RlmC      242 CAVCGFGLHCAIPDMQLTGLEIASFAIACAKQSAELGLTRLQFQALDSTQFATA--QCDVPELVLVNPPRRGIGKPLC 318
Sp1029          313 SCIGTIGLSVAKHVKEVYGVLEIPEAVENSQKNASLNKIITNAHYVCDTAENAMKWLKEGICQPTVILVDPKRLTESFI 392
Sp1901          298 CGVGTIGFAPAKKVKTLRCMDIIEPAIEDAKRNAKRMGFDNTHYEAGTAEIIPRWYKEGYRADALIVDPPRIGLDDKLL 377
B.subtilis YefA 320 CGIGTISLFLAKQAKKVYGVLEIPEAIEDAKRNAELNGNTNAEFAVGEAEIVIPKWYEEGITADTLVVDPPRIGKCDREAL 399

E.coli RlmC      319 DYLSMAPRFIIYSSCNAQTMAKDIRELP--GFRIERVQLFDMFPHTAHYEVLTLLVKQ----- 375
Sp1029          393 KASAQTGADRIAYISCNVATMARDIKLYQELGYELKKVQPVLDLFPQTHHVEVTVALLSKLDVDKHISVEIELDEMDELTSAE 472
Sp1901          378 DTILTYVPEKMYIISCNVSTLARDLVRLEVE-YDLHYIQSVDMPHTARTEAVVKLIKKV----- 436
B.subtilis YefA 400 RTIVEMKPKRVVYVSCNPGTLARDLRVLEDDGGYVTRVQPVDMFPHTNHVECCVLIKKE----- 459

E.coli RlmC      375 ----- 375
Sp1029          473 SKATYAQIKEYVWNKFKLVSTLYIAQIKKCGLELREHYNKSKKDKQIIPQCTPEKEEAIMDALRHFKMI 543
Sp1901          436 ----- 436
B.subtilis YefA 459 ----- 459

```

**Figure S2 Level of m<sup>1</sup>G748 in 23S rRNAs prepared from the parent strain TIGR4 or its derivatives.**

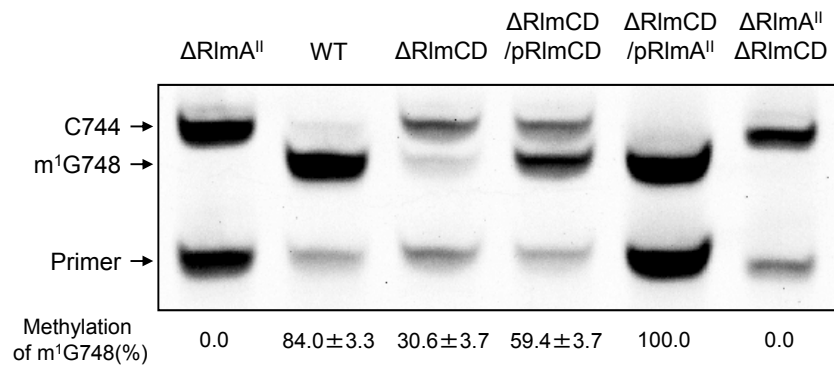

rRNAs prepared from strains TIGR4 (WT), Sp303 ( $\Delta RlmA^{II}$ ), Sp332 ( $\Delta RlmCD$ ), Sp360 ( $\Delta RlmCD/pRlmCD$ ), Sp369 ( $\Delta RlmA^{II}\Delta RlmCD$ ) and Sp370 ( $\Delta RlmCD/pRlmA^{II}$ ) were sequenced by reverse transcriptase extension.

**Figure S3 Time-course of m<sup>1</sup>G748 formation in 23S rRNA catalyzed by 10nM RlmA<sup>II</sup>.**

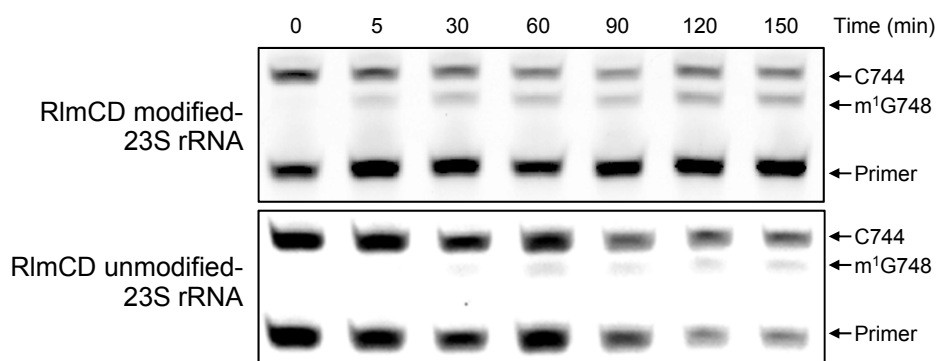

rRNAs (10nM) prepared from strains Sp303 (RlmCD modified-23S rRNA; upper panel) and Sp369 (RlmCD unmodified-23S rRNA; lower panel) were catalyzed by 10nM RlmA<sup>II</sup>. The methylation was stopped using phenol solution at different times and the level of m<sup>1</sup>G748 was analyzed by reverse transcriptase extension.
